# Supplementary material for: Implementation outcomes and strategies for delivering evidence-based hypertension interventions in lower-middle-income countries: Evidence from a multi-country consortium for hypertension control
Source: PubMed Central journal article supplement (PMC10212179; doi:10.1371/journal.pone.0286204), 2023-05-25
Supplement: pone.0286204.s001.pdf [file pone.0286204.s001.pdf]

**S1 Table 1. Specifying Implementation Strategy  
(Example for main implementation components at each site)**

| <b>Prerequisite</b>                       | <b>Ghana</b>                                                                                                                                                                                                                                                                                     | <b>Guatemala</b>                                                                                                                       | <b>India</b>                                                                                                                                                                                                                                                                                                                                               | <b>Kenya</b>                                                                                                                                                                                                                   | <b>Vietnam</b>                                                                                                                                                                                                   |
|-------------------------------------------|--------------------------------------------------------------------------------------------------------------------------------------------------------------------------------------------------------------------------------------------------------------------------------------------------|----------------------------------------------------------------------------------------------------------------------------------------|------------------------------------------------------------------------------------------------------------------------------------------------------------------------------------------------------------------------------------------------------------------------------------------------------------------------------------------------------------|--------------------------------------------------------------------------------------------------------------------------------------------------------------------------------------------------------------------------------|------------------------------------------------------------------------------------------------------------------------------------------------------------------------------------------------------------------|
| <b>Name it</b>                            | Practice facilitation and Task Shifting                                                                                                                                                                                                                                                          | Team based collaborative care                                                                                                          | Task Shifting and Clinical decision support                                                                                                                                                                                                                                                                                                                | Field Observations                                                                                                                                                                                                             | Local needs assessment                                                                                                                                                                                           |
| <b>Define it</b>                          | Practice facilitation is an approach to supporting improvement in primary care practices that focuses on building organizational capacity for continuous improvement.<br>Task Shifting is a capacity building approach where non physician healthcare workers are trained to manage HTN patients | Healthcare personnel from health posts and health centers work collaboratively to establish a treatment plan for hypertensive patients | Task Shifting is a capacity building approach where non physician healthcare workers are trained to do non-essential/preliminary work of patient visit so that the physician can devote time in clinical decision making. Clinical decision support software- Guidelines based algorithms that generate clinical decision prompts for healthcare providers | Field observations of peer navigator actions                                                                                                                                                                                   | Collect and analyze data related to the need for the innovation                                                                                                                                                  |
| <b>Specify it<br/>(Operationalize it)</b> |                                                                                                                                                                                                                                                                                                  |                                                                                                                                        |                                                                                                                                                                                                                                                                                                                                                            |                                                                                                                                                                                                                                |                                                                                                                                                                                                                  |
| <b>The actor</b>                          | Community Health Nurses                                                                                                                                                                                                                                                                          | Physicians, nurses and auxiliary nurses                                                                                                | Nonphysician and physician health care providers                                                                                                                                                                                                                                                                                                           | Research staff                                                                                                                                                                                                                 | Stakeholders: local health leaders, health workers, community health workers (CHWs), patients with HTN                                                                                                           |
| <b>The action</b>                         | Task-strengthening, i.e. Training community health workers in the 5A's (Ask, Assess, Advise, Assist, and Arrange)to identify counsel and refer adults with hypertension                                                                                                                          | Meetings to discuss cases of uncontrolled hypertension, and decide the course of action                                                | Training non physician and physician health care providers on an integrated platform (eCRF and CDSS) to diagnose and manage hypertension and diabetes patients                                                                                                                                                                                             | Trained research staff will observe peer navigator actions and interactions during a site visit. The research staff is provided a checklist of expected behaviors and actions and will check off actions as they are completed | Carry out needs assessment (qualitative study) among stakeholders, Implement National HTN control program: Training health workers and CHWs to improve knowledge and skills in HTN management at community level |

|                                        |                                                                                                                                                                                                                                                                                                                                                    |                                                                      |                                                                                                                                                                                                                                               |                                                       |                                                                                                                                                                                                                                                                                                    |
|----------------------------------------|----------------------------------------------------------------------------------------------------------------------------------------------------------------------------------------------------------------------------------------------------------------------------------------------------------------------------------------------------|----------------------------------------------------------------------|-----------------------------------------------------------------------------------------------------------------------------------------------------------------------------------------------------------------------------------------------|-------------------------------------------------------|----------------------------------------------------------------------------------------------------------------------------------------------------------------------------------------------------------------------------------------------------------------------------------------------------|
| <b>Action Target</b>                   | Identify practice capacity for the adoption of TASSH in CHPS zones and develop a culturally tailored PF strategy using qualitative and quantitative methods. Also, we hope to observe a mean reduction in systolic blood pressure<br>- Unit of measurement<br>+ 12 months for intervention adoption<br>+ 24 months for intervention sustainability | Physicians, nurses and auxiliary nurses                              | Usage of the electronic case record form, appropriate NCD screening uptake, and adoption of the clinical decision support system. Ultimately, we hope that this promotes guideline-based hypertension and diabetes management in this setting | Peer navigation (PNs)                                 | Identify the gaps in HTN management and practice capacity for the adoption of study intervention and develop a culturally appropriate intervention using qualitative methods.<br><br>- Unit of measurement<br>+ 12 months for intervention adoption<br>+ 24 months for intervention sustainability |
| <b>Temporality</b>                     | Implementation Phase: When patients visit the CHPS compounds (after recruitment from home visits and health fairs)                                                                                                                                                                                                                                 | Implementation Phase: Within the first month after enrollment begins | Implementation Phase                                                                                                                                                                                                                          | Implementation Phase: By month 3 of intervention      | Implementation Phase                                                                                                                                                                                                                                                                               |
| <b>Dose</b>                            | 3 days every 6 months                                                                                                                                                                                                                                                                                                                              | At least once per month                                              | Health care visits (frequency?)                                                                                                                                                                                                               | 1 day, continued if needed, based on peer performance | Needs assessment: 3 rounds (in years 1,3,5)                                                                                                                                                                                                                                                        |
| <b>Implementation outcome affected</b> | Adoption, Sustainability                                                                                                                                                                                                                                                                                                                           | Adoption                                                             | Adoption, Scalability                                                                                                                                                                                                                         | Fidelity                                              | Adoption, Sustainability                                                                                                                                                                                                                                                                           |
